# Supplementary material for: Malaria parasites use a soluble RhopH complex for erythrocyte invasion and an integral form for nutrient uptake
Source: eLife journal article supplement (doi:10.7554/elife.65282), 2021-01-04

**A**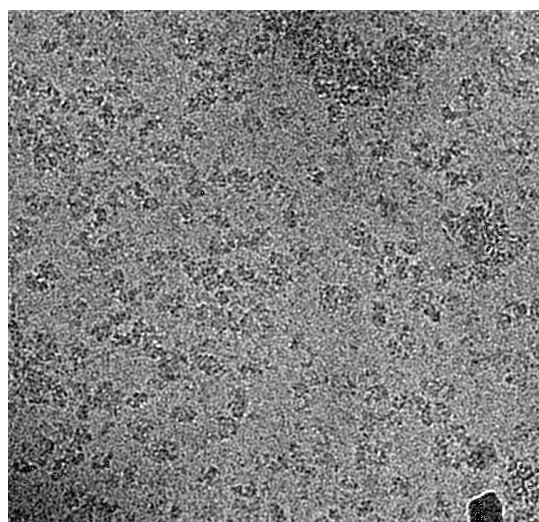

100 nm

1,310 micrographs  
311,390 particles**B**2 rounds of  
2D classification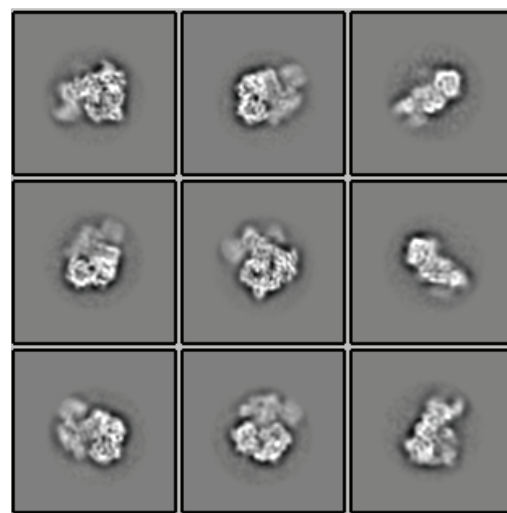

214,233 particles

**C**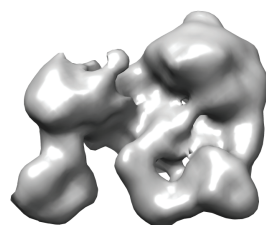initial  
model

3D classification

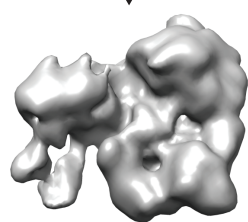class 1  
52,950 particles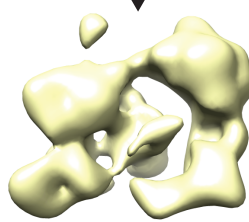class 2  
34,377 particles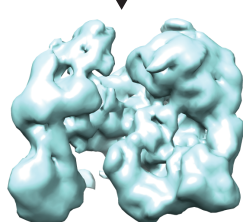class 3  
68,216 particles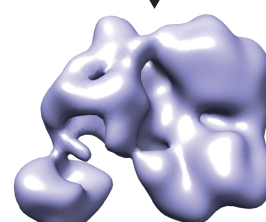class 4  
29,335 particles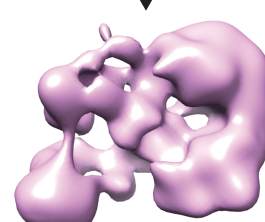class 5  
29,335 particles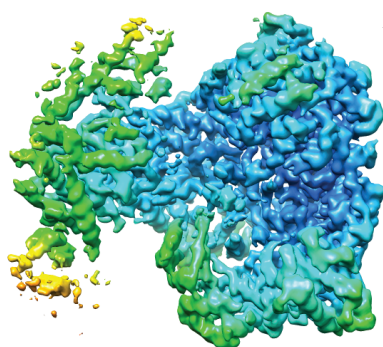3D Autorefine  
3.26 Å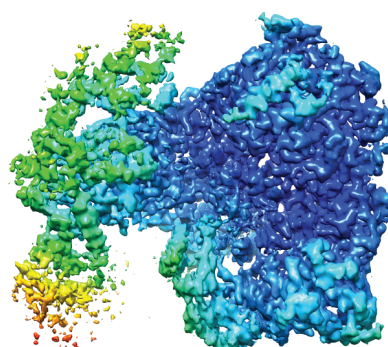particle polishing (2x) and  
CTF refinement (1x)  
2.92 Å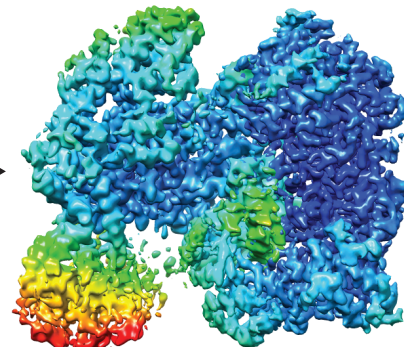multi-body refinement  
masks used for body definition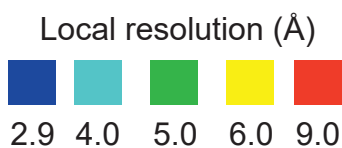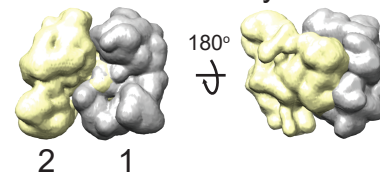

Supplement: supp [file elife-65282-supp-v1.zip]
