# Supplementary material for: Malaria parasites use a soluble RhopH complex for erythrocyte invasion and an integral form for nutrient uptake
Source: eLife journal article supplement (doi:10.7554/elife.65282), 2021-01-04

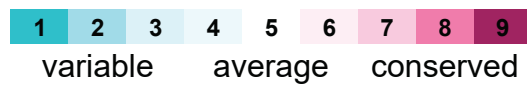

**A** CLAG3 surface for RhopH2 binding

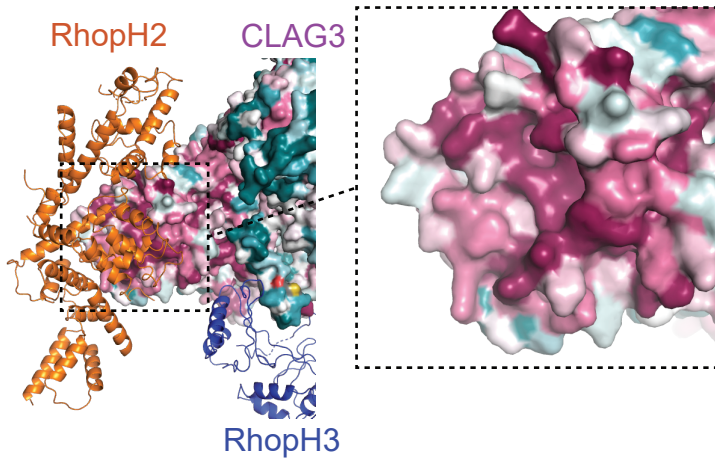

**B** CLAG3 surface for RhopH3 binding

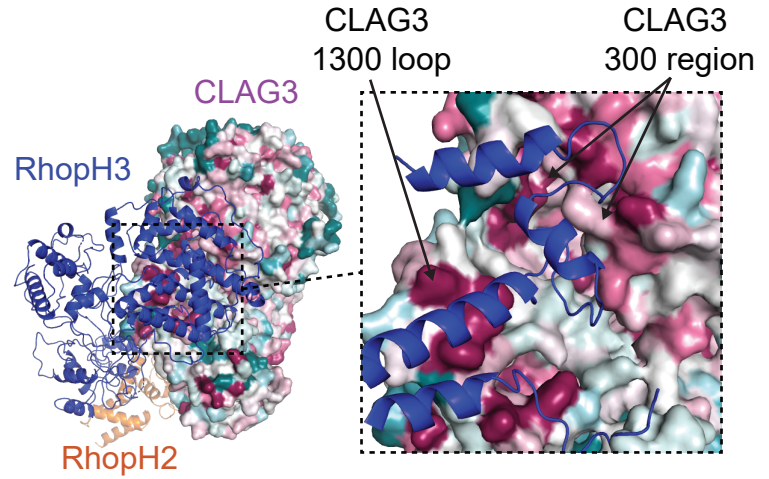

**C** RhopH2 surface for CLAG3 binding

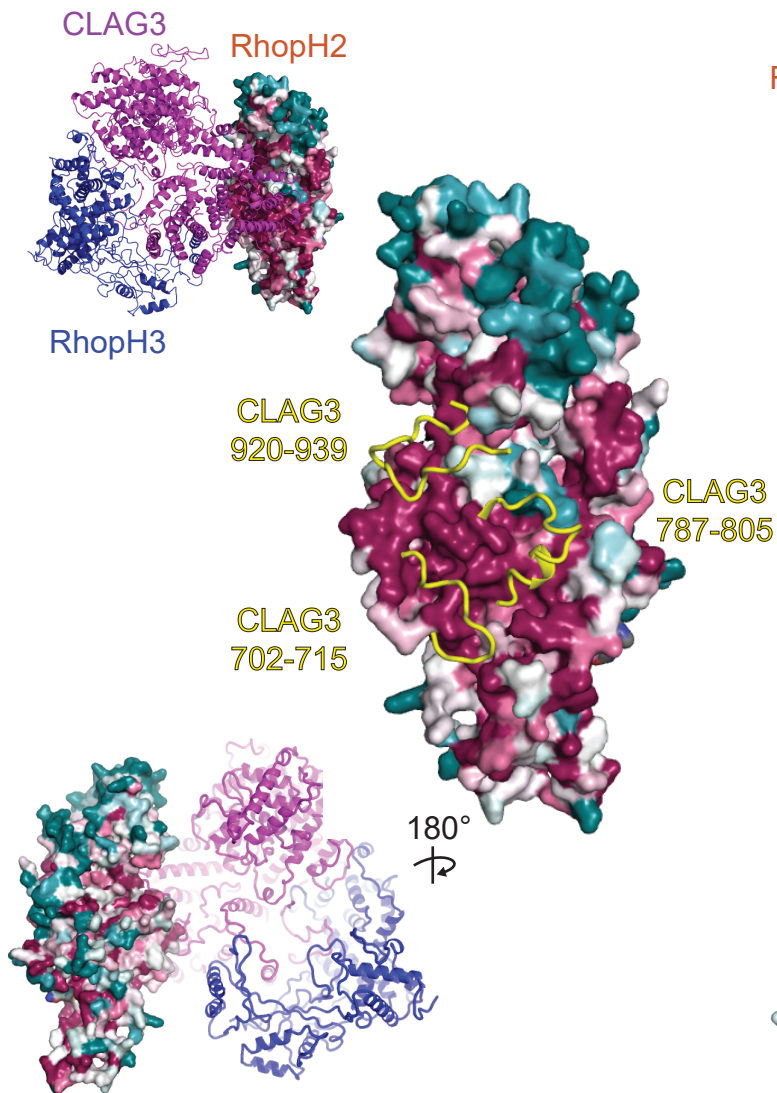

**D** RhopH3 surface for CLAG3 binding

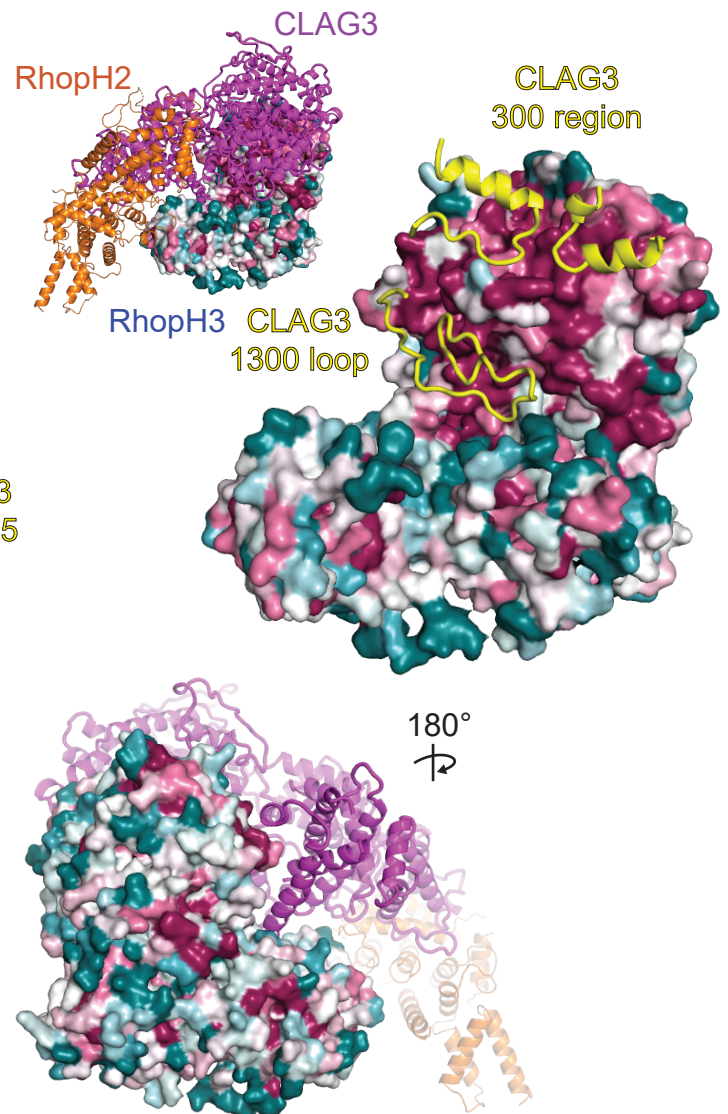

Supplement: supp [file elife-65282-supp-v1.zip]
