# Supplementary material for: Malaria parasites use a soluble RhopH complex for erythrocyte invasion and an integral form for nutrient uptake
Source: eLife journal article supplement (doi:10.7554/elife.65282), 2021-01-04
Supplement: supp [file elife-65282-supp-v1.zip]

A

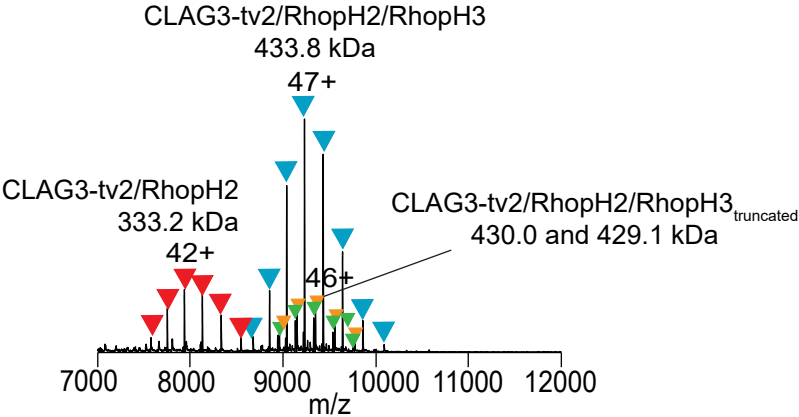

B

Native MS analysis of RhopH complexes

| Measured Mass<br>±SD (Da)* | Assignment                         | Expected<br>Mass (Da)** | Δ Mass<br>(Da)*** | % Mass<br>Error |
|----------------------------|------------------------------------|-------------------------|-------------------|-----------------|
| 433,790 ± 10               | C3-tv2/R2/R3                       | 436,494                 | -2,704            | (0.62)          |
| 430,005 ± 3                | C3-tv2/R2/R3 <sub>truncated1</sub> |                         |                   |                 |
| 429,135 ± 10               | C3-tv2/R2/R3 <sub>truncated2</sub> |                         |                   |                 |
| 333,232 ± 3                | C3-tv2/R2                          | 334,448                 | -1,216            | (0.36)          |

C

| C3-tv2 | R2 | R3 | Expected<br>Mass (Da) |
|--------|----|----|-----------------------|
| 0      | 0  | 2  | 204,092               |
| 0      | 1  | 1  | 262,499               |
| 1      | 0  | 1  | 276,041               |
| 0      | 0  | 3  | 306,138               |
| 0      | 2  | 0  | 320,906               |
| 1      | 1  | 0  | 334,448               |
| 2      | 0  | 0  | 347,989               |
| 0      | 1  | 2  | 364,545               |
| 1      | 0  | 2  | 378,087               |
| 0      | 2  | 1  | 422,952               |
| 1      | 1  | 1  | 436,494               |
| 2      | 0  | 1  | 450,035               |
