# Supplementary figures and images for: Malaria parasites use a soluble RhopH complex for erythrocyte invasion and an integral form for nutrient uptake
Source: eLife journal article supplement (doi:10.7554/elife.65282), 2021-01-04

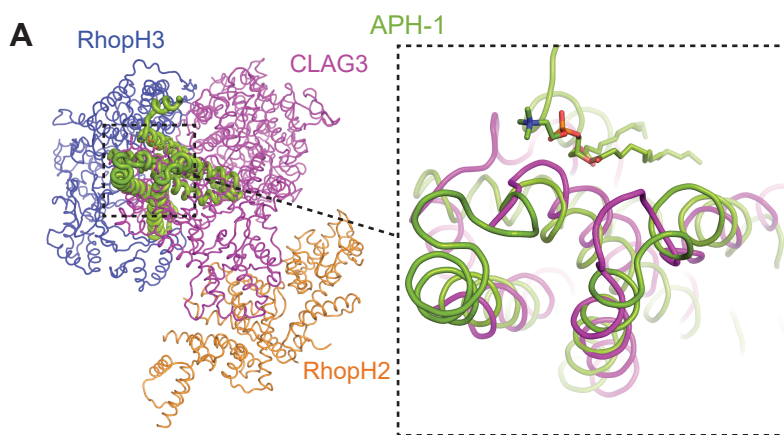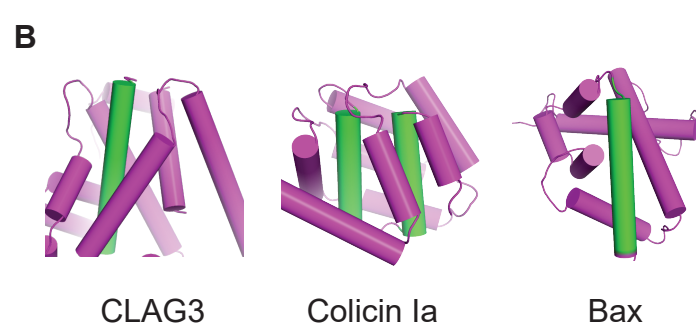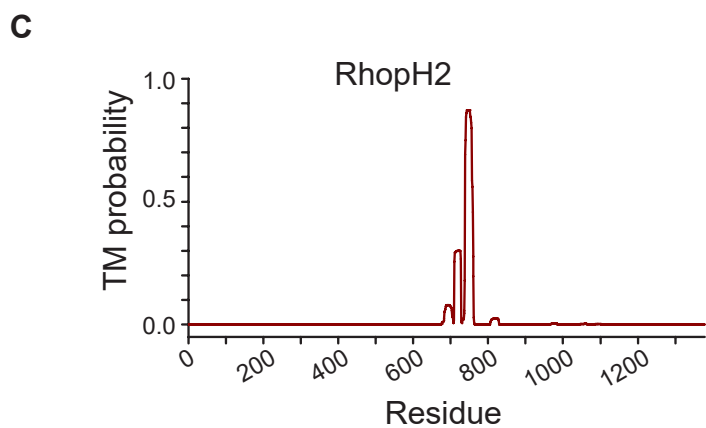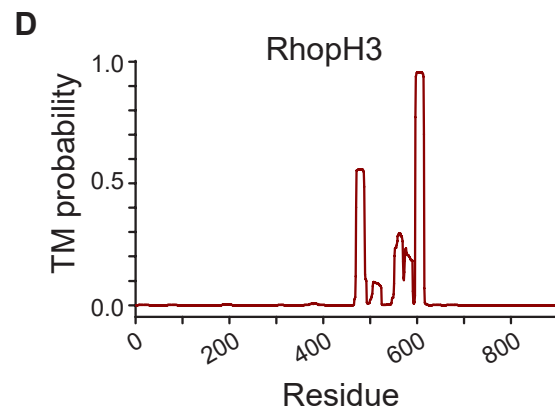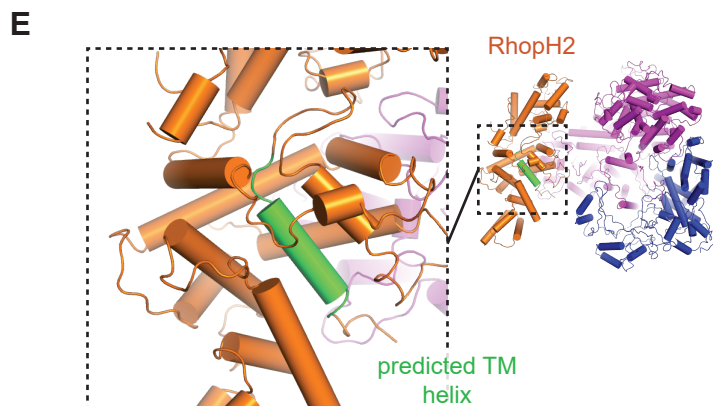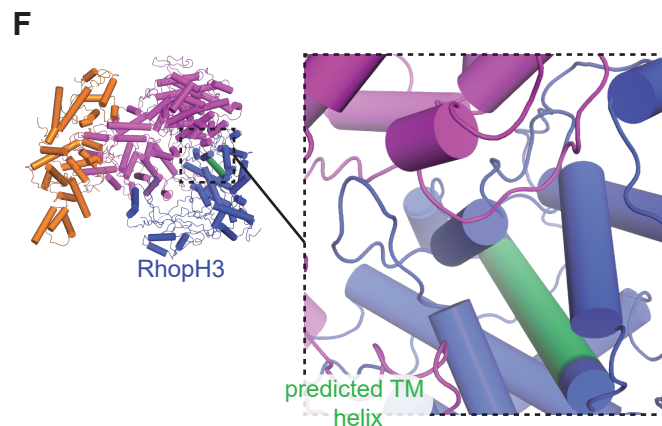

Supplement: supp [file elife-65282-supp-v1.zip]

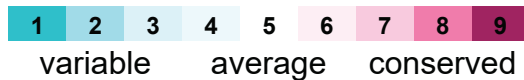

**A**

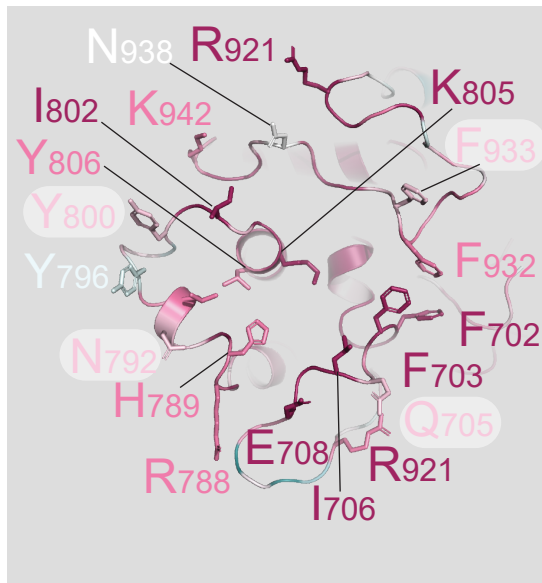

**CLAG3**

**B**

180°

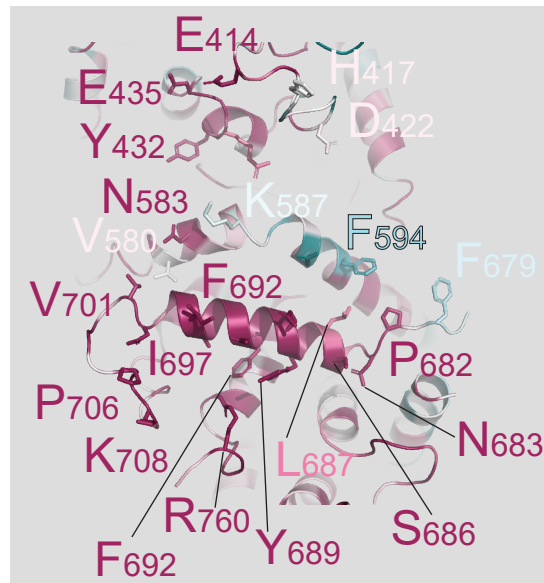

**RhopH2**

Supplement: supp [file elife-65282-supp-v1.zip]

A

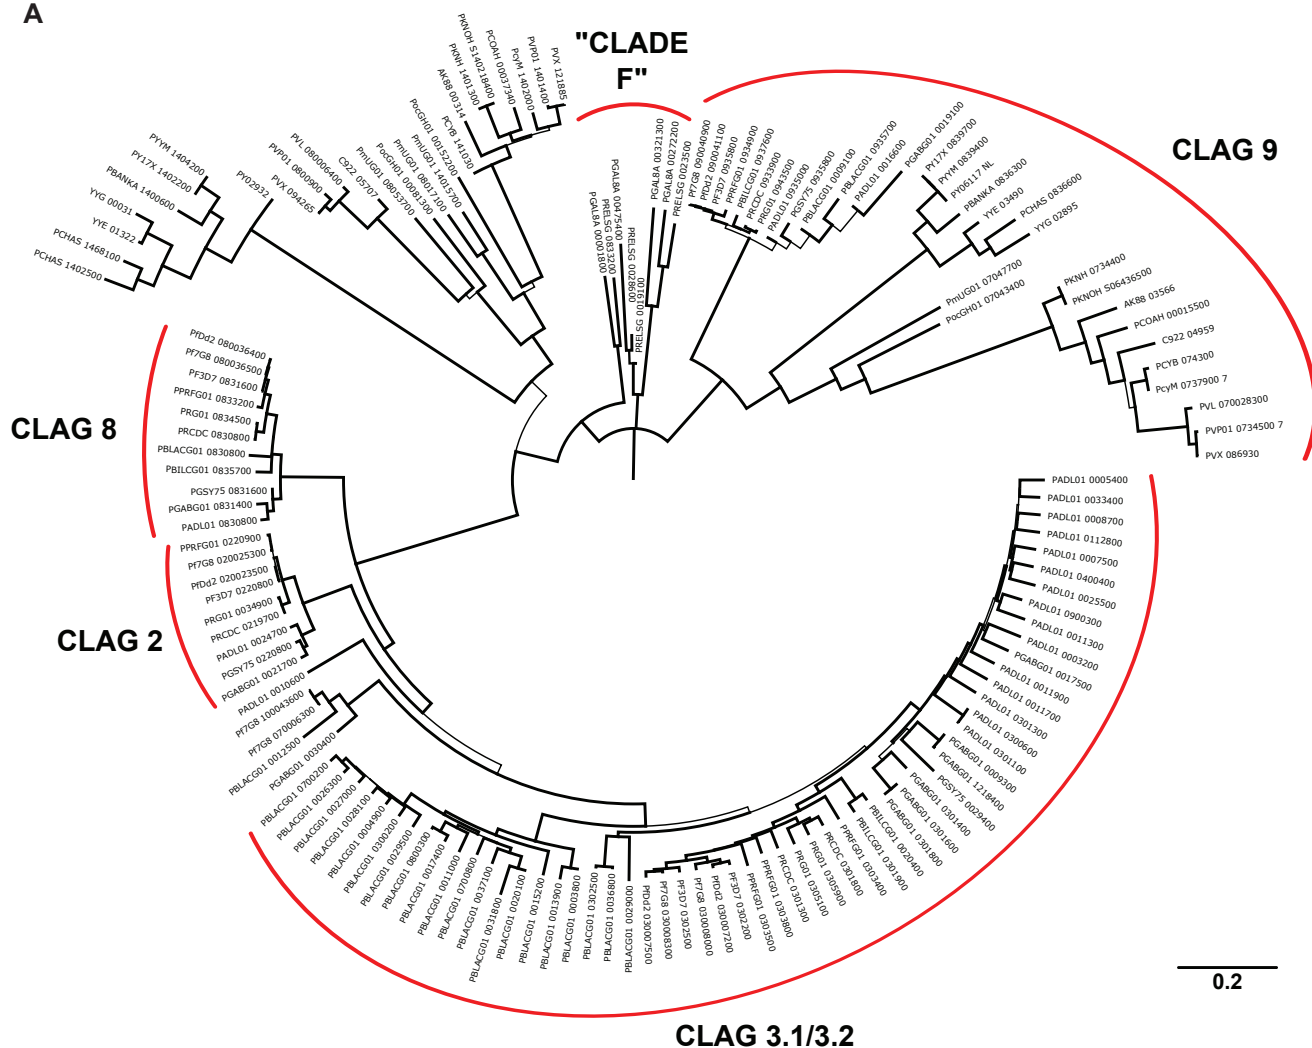

B

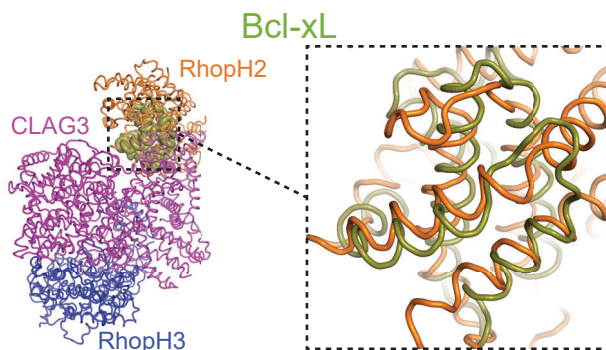

C

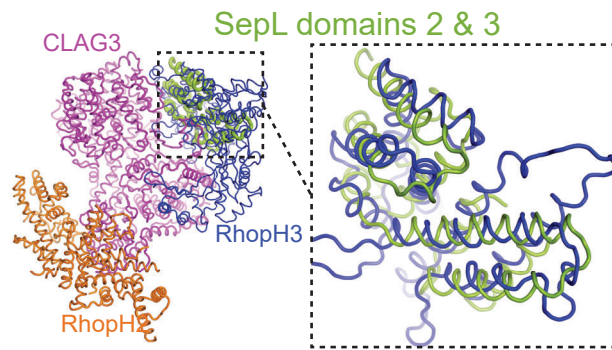

Supplement: supp [file elife-65282-supp-v1.zip]

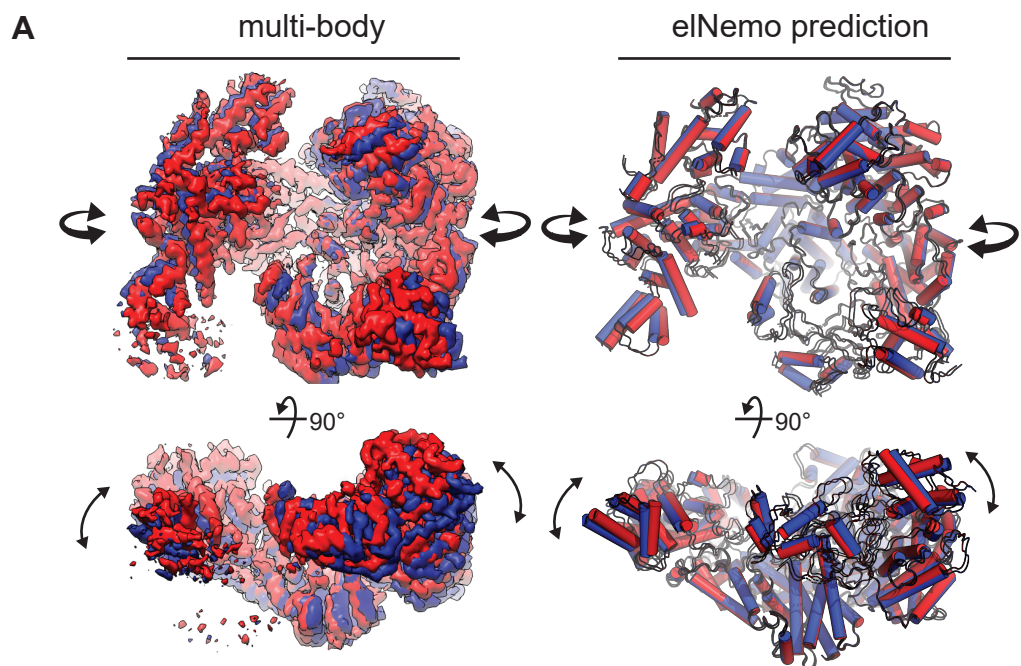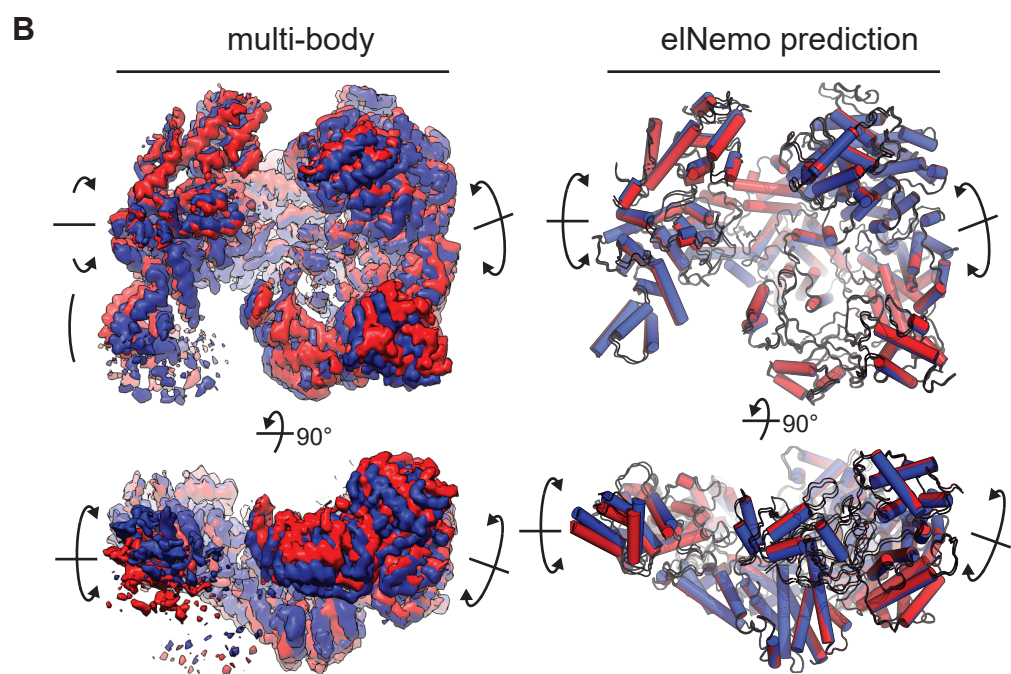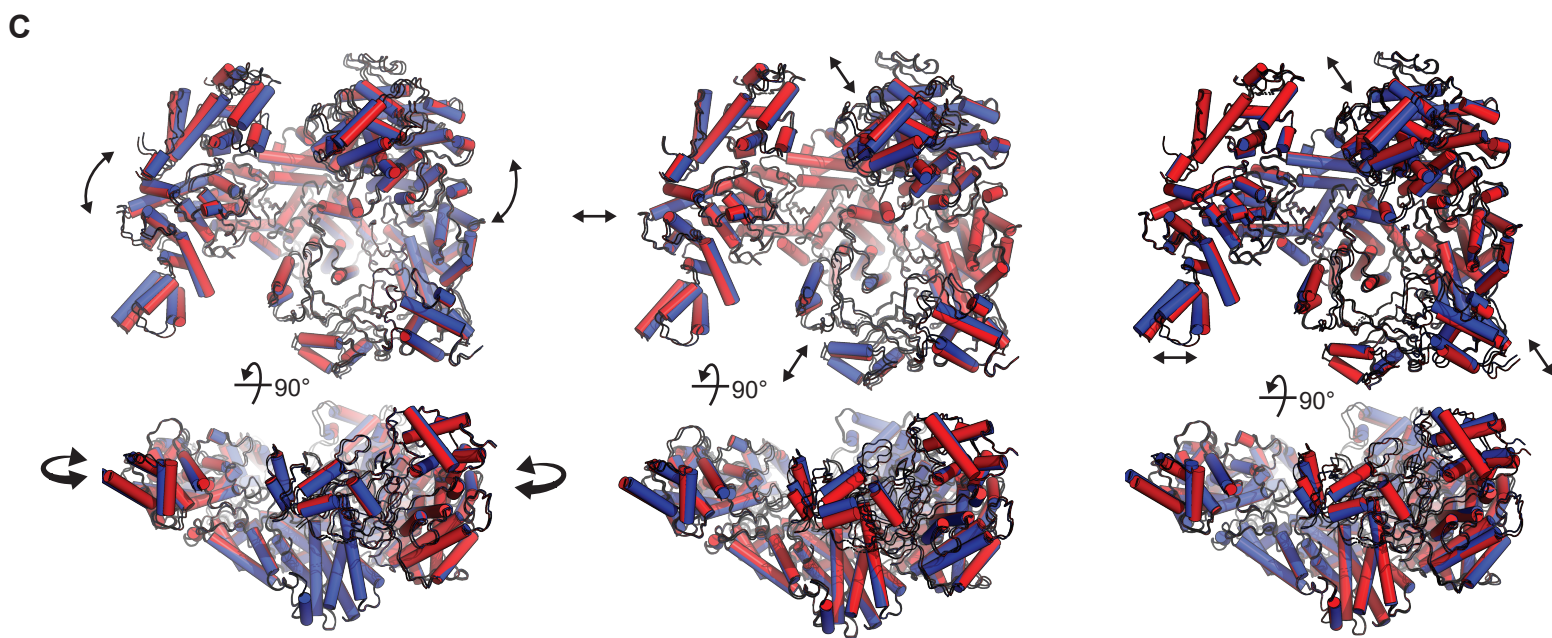

Supplement: supp [file elife-65282-supp-v1.zip]

A

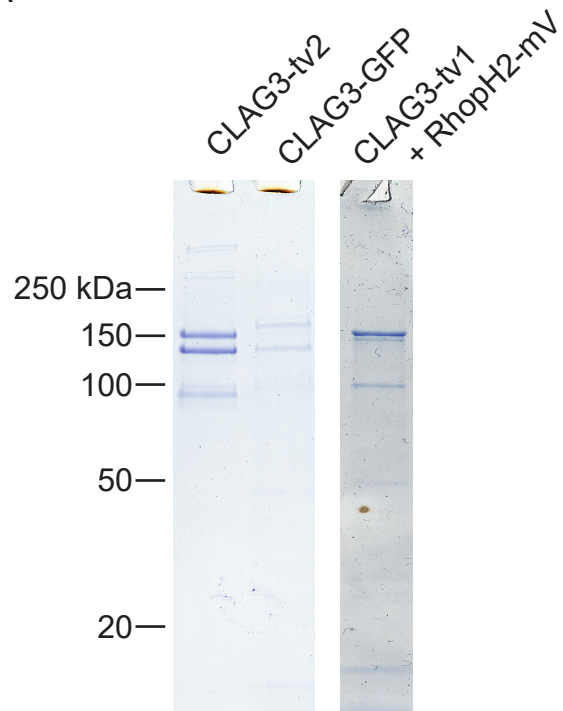

B

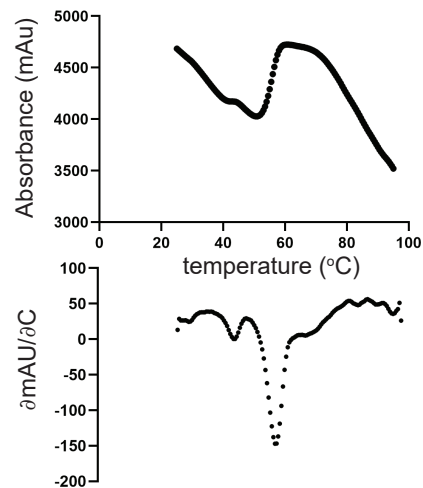

C

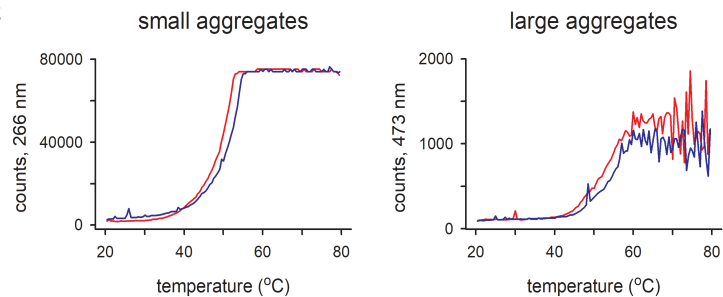

Supplement: supp [file elife-65282-supp-v1.zip]
